# Supplementary material for: Diabetes causal attributions among affected and unaffected individuals
Source: PubMed Central journal article supplement — BMJ Open Diabetes Res Care. 2019 Aug 30;7(1):e000708. doi: 10.1136/bmjdrc-2019-000708 (PMC6731786; doi:10.1136/bmjdrc-2019-000708), 2019-08-30
Supplement: bmjdrc-2019-000708supp001.pdf [file bmjdrc-2019-000708supp001.pdf]

Supplemental Table 1. Explanations of dimensions used for knowledge coding scheme.

| Coding Dimensions       |                                                                                                                                                                                                                                                    |
|-------------------------|----------------------------------------------------------------------------------------------------------------------------------------------------------------------------------------------------------------------------------------------------|
| Age of Onset            | T1D is usually diagnosed in children and young adults. T2D most commonly develops in adulthood.                                                                                                                                                    |
| Causal Factors          | T1D is an autoimmune disorder, caused by factors like genetics, virus exposure etc. that cannot be prevented. It has no known lifestyle component. T2D is caused by a combination of lifestyle factors as well as genetics and can be preventable. |
| Severity                | T1D is typically more severe than T2D.                                                                                                                                                                                                             |
| Prevalence              | T1D is less common than T2D.                                                                                                                                                                                                                       |
| Symptom Controllability | In T1D it is harder to control blood sugar, and blood sugar needs to be monitored more frequently. In T2D, blood sugar is more easily controlled, and blood sugar can be monitored less frequently.                                                |
| Pathophysiology         | In T1D, the pancreas cannot produce insulin (or very little). In T2D there is either limited insulin (insulin deficiency) or the body cannot use the insulin properly (insulin resistance).                                                        |
| Treatment               | Individuals with T1D must take insulin (insulin dependent). T2D can be treated in a variety of ways including lifestyle medications, oral medications, and insulin.                                                                                |
| Outcome                 | Individuals with T2D can go into remission; those with T1D cannot.                                                                                                                                                                                 |
