# Supplementary material for: Diabetes causal attributions among affected and unaffected individuals
Source: PubMed Central journal article supplement — BMJ Open Diabetes Res Care. 2019 Aug 30;7(1):e000708. doi: 10.1136/bmjdrc-2019-000708 (PMC6731786; doi:10.1136/bmjdrc-2019-000708), 2019-08-30
Supplement: bmjdrc-2019-000708supp002.pdf [file bmjdrc-2019-000708supp002.pdf]

Supplemental Table 2. Examples of responses classified as *poor*, *ok*, and *good*. Two examples of *poor* responses are included to show the difference between an incomplete and an incorrect answer.

| Knowledge Response Examples |                                                                                                                                                                                   |
|-----------------------------|-----------------------------------------------------------------------------------------------------------------------------------------------------------------------------------|
| <i>Poor</i> (incomplete)    | “One can be managed by dietary restrictions.”                                                                                                                                     |
| <i>Poor</i> (incorrect)     | “Type one is the early stage and type two is the middle stage”                                                                                                                    |
| <i>Ok</i>                   | “Type 2 Diabetes is an issue where the body does not use insulin effectively whereas with Type 1 Diabetes the body has a lack of insulin.”                                        |
| <i>Good</i>                 | “Type 1 cannot be cured, and the person has to take insulin every day. Type 2 can be controlled by diet, diet and medication or sometimes the need for insulin is also required.” |
