# Supplementary material for: Diabetes causal attributions among affected and unaffected individuals
Source: PubMed Central journal article supplement — BMJ Open Diabetes Res Care. 2019 Aug 30;7(1):e000708. doi: 10.1136/bmjdrc-2019-000708 (PMC6731786; doi:10.1136/bmjdrc-2019-000708), 2019-08-30
Supplement: bmjdrc-2019-000708supp003.pdf [file bmjdrc-2019-000708supp003.pdf]

Supplemental Table 3. Sample characteristics and descriptive statistics for all respondents.

| Variable           | Understanding Classification |             |              | <i>p</i> value <sup>a</sup> |
|--------------------|------------------------------|-------------|--------------|-----------------------------|
|                    | Poor                         | OK          | Good         |                             |
| <b>Unaffected</b>  |                              |             |              |                             |
| <i>n</i>           | 138 (30.1%)                  | 200 (43.7%) | 120 (26.2%)  |                             |
| Age, years         | 31.48 (8.2)                  | 32.87 (8.7) | 36.87 (10.5) | <.001                       |
| BMI                | 26.72 (6.1)                  | 27.15 (6.9) | 27.01 (6.5)  | .83                         |
| College Graduate   | 54 (39.1%)                   | 90 (45.0%)  | 70 (58.3%)   | .007                        |
| Non-Hispanic White | 89 (65.4%)                   | 141 (71.6%) | 96 (80.0%)   | .035                        |
| Female             | 36 (26.3%)                   | 94 (47.0%)  | 65 (54.2%)   | <.001                       |
| <b>T1D</b>         |                              |             |              |                             |
| <i>n</i>           | 10 (5.2%)                    | 70 (36.5%)  | 112 (58.3%)  |                             |
| Age, years         | 35.5 (9.9)                   | 41.1 (13.1) | 39.94 (15.0) | .548                        |
| BMI                | 25.33 (2.3)                  | 27.73 (7.1) | 25.95 (4.7)  | .102                        |
| College Graduate   | 7 (70.0%)                    | 45 (64.3%)  | 81 (72.3%)   | .52                         |
| Non-Hispanic White | 5 (50.0 %)                   | 58 (85.3%)  | 102 (91.9%)  | .004                        |
| Female             | 2 (20.0%)                    | 55 (78.6%)  | 83 (74.8%)   | <.001                       |
| <b>T2D</b>         |                              |             |              |                             |
| <i>n</i>           | 17 (9.0%)                    | 107 (56.3%) | 83 (43.7%)   |                             |
| Age, years         | 51.3 (15.7)                  | 53.8 (11.5) | 54.3 (11.5)  | .658                        |
| BMI                | 31.8 (8.4)                   | 33.5 (9.3)  | 33.6 (8.9)   | .748                        |
| College Graduate   | 7 (41.2%)                    | 57 (53.5%)  | 45 (54.2%)   | .608                        |
| Non-Hispanic White | 11 (73.3%)                   | 78 (73.6%)  | 71 (87.7%)   | .053                        |
| Female             | 10 (58.5%)                   | 77 (72.0%)  | 145 (70.0%)  | .546                        |

Note. M (SD) or frequency (percent) reported.

<sup>a</sup>*p* value reflects group differences among understanding classification and within respondent group.
